# Supplementary material
Source: publisher site journal article supplement (https://www.dovepress.com/article/384081)
Supplement: Supplementary file 1 [file get_supplementary_file.php]

**Supplementary material**

**Supplementary table 1. BUN levels in patients with bleeding complications after Placement of Central Venous Catheter.**

| **Type of complication** | **Complication related to vascular access insertion.** | |
| --- | --- | --- |
| **BUN value (mg / dl)** | **Description of the case and event** |
| **Decrease in hemoglobin level ≥ 1.5g/dL** | 86 | Bleeding from the insertion site managed with direct pressure and suture. Due to profuse bleeding at the insertion site, he required a transfusion of 2 Red Blood Cell Units. |
| **Bleeding at the catheter insertion site.** | 92.7 | Compression and healing. |
| 118 | Compression and healing. |
| 84 | Compression and healing. |
| 72 | Compression and healing. |
| 100 | History of chronic kidney disease, I present epistaxis with blood loss of 1500 CC. |
| 88 | Little bleeding at the insertion site, required a compression bandage and physical means. |
| 82 | Compression and healing. |
| 92.4 | Compression and healing. |
| 86 | Direct compression and suture requirement. |
| 77.5 | Compression and healing. |
| 99.9 | Compression and healing. |
| 80.8 | Compression and healing. |
| 72 | Compression and healing. |
| 82 | Bleeding at the insertion site, after the catheter has been sutured. Solve with healings. |
| 128.9 | Compression and healing. |
| 105.2 | Compression and healing. |
| 73.7 | Compression and healing. |
| 91.7 | Compression and healing. |
| 72.9 | Compression and healing. |
| 147.7 | Compression and healing. |
| 105 | Compression and healing. |
| 95.2 | Compression and healing. |
| 81 | Compression and healing. |
| 133.5 | Compression and healing. |
| 74 | Compression and healing. |
| 76 | Compression and healing. |
| 89 | Compression and healing. |
| 85.7 | Compression and healing. |
| 81.4 | Compression and healing. |
| 81.4 | Compression and healing. |
| 126 | Compression and healing. |
| 84.3 | Compression and healing. |
| 75 | Compression and healing. |
| 153.1 | Compression and healing. |
| 153.1 | Compression and healing. |
| 127 | Compression and healing. |
| 72.1 | Compression and healing. |
| 81.6 | Compression and healing. |
| 110.4 | Compression and healing. |
| 103.9 | Compression and healing. |
| 80.1 | Compression and healing. |
| 114.7 | Compression and healing. |
| 154.9 | Compression and healing. |
| 80.9 | Compression and healing. |
| 104.5 | Compression and healing. |
| 123.4 | Compression and healing. |
| 92.4 | Compression and healing. |
| 92.4 | Compression and healing. |
| 71.6 | Compression and healing. |
| 141.8 | Compression and healing. |
| 87.8 | Compression and healing. |
| **Hematoma at the catheter insertion site.** | 118 | Compression and healing. |
| 88 | Physical media at the local level for resolution. |
| 93 | Non-expansive hematoma, did not require interventions. |
| 71.5 | Hematoma resolved with compression and physical means. |
| 80.2 | Non-expansive hematoma, Management with physical means. |
| 128.9 | No interventions described |
| 81 | Healing and Physical means. |
| 76 | No interventions described |
| 89 | Healings and physical means. |
| 85.7 | Direct compression, healing and physical means. |
| 81,6 | Non-expansive hematoma, Management with physical means. |
| 126 | Hematoma resolved with compression and physical means. |
| 80.7 | Physical media at the local level for resolution. |
| 123.4 | Hematoma resolved with compression and physical means. |
| 141.8 | Physical media at the local level for resolution. |
| **Arterial puncture under ultrasound guidance.** | 82 | Compression and healing. |
| 128.9 | Ultrasound-guided rearrangement, without additional intervention. |
| 81 | Healings. |
| 133.5 | Compression and healing. |
| 126 | Compression and healing. |
